# Supplementary material
Source: PubMed Central journal article supplement (PMC5724772)
Supplement: NIHMS896571-supplement-supplement_1.pdf [file NIHMS896571-supplement-supplement_1.pdf]

31. Y.-L. Sung, J. Jeang, C.-H. Lee, and W.-C. Shih, *Fabricating optical lenses by inkjet printing and heat-assisted in situ curing of polydimethylsiloxane for smartphone microscopy*, *J. Biomed. Opt.*, vol. 20, p. 047005, 2015.
32. D. Malacara, *Optical Shop Testing*. 3<sup>rd</sup> ed. Wiley, New York, 2007.
33. J. C. Wyant, *White light interferometry*, *Proc. SPIE* 4737, 98–107 (2002).
34. Luxexcel Refractive Index Data, <http://info.luxexcel.com/download-refractive-index-graph>, last accessed 12/21/2016
35. Luxexcel Material Info, <https://www.luxexcel.com/optics-prototyping/material-overview>, last accessed 12/21/2016

## 7 APPENDIX

**Supplemental Table 1:** White light interferometry data comparison for 3D printed lenses and glass lenses.

| <b>Lens ID</b> | <b>Nominal Radius of Curvature (mm)</b> | <b>Software-calculated Radius of Curvature (mm)</b> | <b>Peak-to-valley (nm)</b> | <b>Root mean squared (nm)</b> | <b>Ra (nm)</b> |
|----------------|-----------------------------------------|-----------------------------------------------------|----------------------------|-------------------------------|----------------|
| 3247938.76     |                                         | 38.81                                               | 5                          | 1                             | 1              |
| A_01 (1)       |                                         | 33.94                                               | 125                        | 20                            | 16             |
| A_01 (2)       |                                         | 34.60                                               | 112                        | 22                            | 18             |
| A_01 (3)       |                                         | 34.43                                               | 96                         | 23                            | 18             |
| 3296231.01     |                                         | 31.01                                               | 7                          | 1                             | 1              |
| A_02 (1)       |                                         | 30.99                                               | 27                         | 6                             | 5              |
| A_02 (2)       |                                         | 31.10                                               | 39                         | 11                            | 10             |
| A_02 (3)       |                                         | 31.14                                               | 30                         | 11                            | 10             |
| 3297477.52     |                                         | 77.34                                               | 7                          | 1                             | 1              |
| A_03 (1)       |                                         | 63.89                                               | 68                         | 19                            | 16             |
| A_03 (2)       |                                         | 74.27                                               | 50                         | 13                            | 11             |
| A_03 (3)       |                                         | 73.65                                               | 48                         | 14                            | 12             |
| LA120751.5     |                                         | 51.47                                               | 5                          | 1                             | 1              |
| B_01 (1)       |                                         | 44.95                                               | 43                         | 8                             | 6              |
| B_01 (2)       |                                         | 45.79                                               | 44                         | 11                            | 10             |
| B_01 (3)       |                                         | 44.84                                               | 46                         | 10                            | 9              |
| LA130420.6     |                                         | 20.58                                               | 7                          | 1                             | 1              |
| B_02 (1)       |                                         | 19.32                                               | 108                        | 20                            | 16             |
| B_02 (2)       |                                         | 19.19                                               | 44                         | 8                             | 6              |
| B_02 (3)       |                                         | 19.28                                               | 47                         | 10                            | 9              |
| 6353614.88     |                                         | 14.96                                               | 10                         | 2                             | 2              |

|                               |       |    |    |    |
|-------------------------------|-------|----|----|----|
| <i>BiConvexLens_01</i><br>(1) | 14.74 | 85 | 18 | 15 |
| <i>BiConvexLens_01</i><br>(2) | 14.72 | 37 | 6  | 6  |
| <i>BiConvexLens_01</i><br>(3) | 14.77 | 62 | 14 | 12 |

**Supplemental Table 2:** Fizeau data comparison for Luxexcel lenses against corresponding Edmund Optics/Thorlabs lenses. Radius of Curvature measurements were taken three times for each lens.

| <i>Lens ID</i>           | <i>Nominal RoC (mm)</i> | <i>Fizeau Measured RoC (mm)</i> | <i>Peak-to-valley (wave)</i> | <i>Root mean squared (wave)</i> | <i>Astigmatism Magnitude (wave)</i> | <i>Coma Magnitude (wave)</i> |
|--------------------------|-------------------------|---------------------------------|------------------------------|---------------------------------|-------------------------------------|------------------------------|
| 32479<br><i>A_01 (1)</i> | 38.76                   | 1.38.765                        | 0.637                        | 0.012                           | 0.011                               | 0.037                        |
|                          |                         | 2.38.765                        |                              |                                 |                                     |                              |
|                          |                         | 3.38.771                        |                              |                                 |                                     |                              |
| <i>A_01 (2)</i>          | 38.76                   | 1.34.203                        | 7.224                        | 1.620                           | 7.755                               | 1.045                        |
|                          |                         | 2.34.261                        |                              |                                 |                                     |                              |
|                          |                         | 3.34.279                        |                              |                                 |                                     |                              |
| <i>A_01 (3)</i>          | 38.76                   | 1.34.877                        | 8.074                        | 1.744                           | 8.434                               | 1.016                        |
|                          |                         | 2.34.834                        |                              |                                 |                                     |                              |
|                          |                         | 3.34.862                        |                              |                                 |                                     |                              |
| 32962<br><i>A_02 (1)</i> | 31.01                   | 1.31.023                        | 0.080                        | 0.007                           | 0.012                               | 0.024                        |
|                          |                         | 2.31.023                        |                              |                                 |                                     |                              |
|                          |                         | 3.31.024                        |                              |                                 |                                     |                              |
| <i>A_02 (2)</i>          | 31.01                   | 1.31.013                        | 4.692                        | 0.760                           | 3.554                               | 1.009                        |
|                          |                         | 2.30.948                        |                              |                                 |                                     |                              |
|                          |                         | 3.31.011                        |                              |                                 |                                     |                              |
| <i>A_02 (3)</i>          | 31.01                   | 1.30.876                        | 12.383                       | 2.382                           | 11.695                              | 0.876                        |
|                          |                         | 2.30.882                        |                              |                                 |                                     |                              |
|                          |                         | 3.30.881                        |                              |                                 |                                     |                              |
| 32974<br><i>A_03 (1)</i> | 77.52                   | 1.77.467                        | 0.079                        | 0.008                           | 0.024                               | 0.029                        |
|                          |                         | 2.77.457                        |                              |                                 |                                     |                              |
|                          |                         | 3.77.456                        |                              |                                 |                                     |                              |
| <i>A_03 (2)</i>          | 77.52                   | 1.68.352                        | 7.258                        | 1.652                           | 7.917                               | 0.432                        |
|                          |                         | 2.68.360                        |                              |                                 |                                     |                              |
|                          |                         | 3.68.369                        |                              |                                 |                                     |                              |
| <i>A_03 (3)</i>          | 77.52                   | 1.73.277                        | 8.236                        | 1.768                           | 8.575                               | 1.041                        |
|                          |                         | 2.73.272                        |                              |                                 |                                     |                              |
|                          |                         | 3.73.272                        |                              |                                 |                                     |                              |

|                        |       |  |          |       |       |       |       |
|------------------------|-------|--|----------|-------|-------|-------|-------|
|                        |       |  | 3.73.271 |       |       |       |       |
| <i>A_03</i>            | (3)   |  | 1.74.102 | 7.169 | 1.620 | 7.743 | 0.826 |
|                        |       |  | 2.74.101 |       |       |       |       |
|                        |       |  | 3.74.098 |       |       |       |       |
| <i>LA1207</i>          | 51.5  |  | 1.51.282 | 0.135 | 0.016 | 0.029 | 0.008 |
|                        |       |  | 2.51.279 |       |       |       |       |
|                        |       |  | 3.51.286 |       |       |       |       |
| <i>B_01</i>            | (1)   |  | 1.44.902 | 2.096 | 0.328 | 1.432 | 0.679 |
|                        |       |  | 2.44.925 |       |       |       |       |
|                        |       |  | 3.44.897 |       |       |       |       |
| <i>B_01</i>            | (2)   |  | 1.45.624 | 1.908 | 0.301 | 1.275 | 0.767 |
|                        |       |  | 2.45.629 |       |       |       |       |
|                        |       |  | 3.45.632 |       |       |       |       |
| <i>B_01</i>            | (3)   |  | 1.45.203 | 2.140 | 0.379 | 1.580 | 0.724 |
|                        |       |  | 2.45.210 |       |       |       |       |
|                        |       |  | 3.45.206 |       |       |       |       |
| <i>LA1304</i>          | 20.6  |  | 1.20.584 | 0.140 | 0.014 | 0.033 | 0.016 |
|                        |       |  | 2.20.595 |       |       |       |       |
|                        |       |  | 3.20.595 |       |       |       |       |
| <i>B_02</i>            | (1)   |  | 4.19.305 | 2.291 | 0.398 | 1.852 | 0.679 |
|                        |       |  | 5.19.312 |       |       |       |       |
|                        |       |  | 6.19.309 |       |       |       |       |
| <i>B_02</i>            | (2)   |  | 1.19.104 | 2.232 | 0.385 | 1.481 | 0.767 |
|                        |       |  | 2.19.099 |       |       |       |       |
|                        |       |  | 3.19.101 |       |       |       |       |
| <i>B_02</i>            | (3)   |  | 1.19.132 | 2.753 | 0.441 | 2.389 | 0.545 |
|                        |       |  | 2.19.128 |       |       |       |       |
|                        |       |  | 3.19.127 |       |       |       |       |
| <i>63536</i>           | 14.88 |  | 1.14.881 | 0.127 | 0.016 | 0.034 | 0.056 |
|                        |       |  | 2.14.879 |       |       |       |       |
|                        |       |  | 3.14.881 |       |       |       |       |
| <i>BiConvexLens_01</i> | (1)   |  | 1.14.779 | 7.553 | 1.616 | 2.223 | 3.022 |
|                        |       |  | 2.14.870 |       |       |       |       |
|                        |       |  | 3.14.698 |       |       |       |       |
| <i>BiConvexLens_01</i> | (2)   |  | 1.14.695 | 8.027 | 1.692 | 3.022 | 2.678 |
|                        |       |  | 2.14.689 |       |       |       |       |
|                        |       |  | 3.14.686 |       |       |       |       |
| <i>BiConvexLens_01</i> | (3)   |  | 1.14.702 | 7.995 | 1.664 | 2.723 | 2.874 |
|                        |       |  | 2.14.696 |       |       |       |       |
|                        |       |  | 3.14.711 |       |       |       |       |
